# Supplementary material for: A recurrent MCF2 variant which disrupts DCC binding leads to congenital mirror movements and corpus callosum agenesis
Source: Research Square preprint supplement (doi:10.21203/rs.3.rs-5227743/v1), 2024-12-10
Supplement: Supplementary file 1 [file 06b18908b149843f2264403c.docx]

**Supplemental material**

**Video legend. CMM in case 1 harboring the MCF2 variant [NM_001171876.2: c.31C>T p.(R11W)]**

Symmetric contralateral mirror movements are observed upon fine finger movements and distal upper limb muscles bilaterally rated 3/5 according to the Woods and Teuber scale(Woods & Teuber, 1978). Proband is able to write the same sentence simultaneously using both hands in a mirrored fashion.

**Supplemental table 1**

Rare genetic variants identified in case 1 by exome sequencing.

**Supplemental figures**

**Figure S1. The MCF2E427K and MCF2T934I variants have no impact on MCF2 GEF activity.**


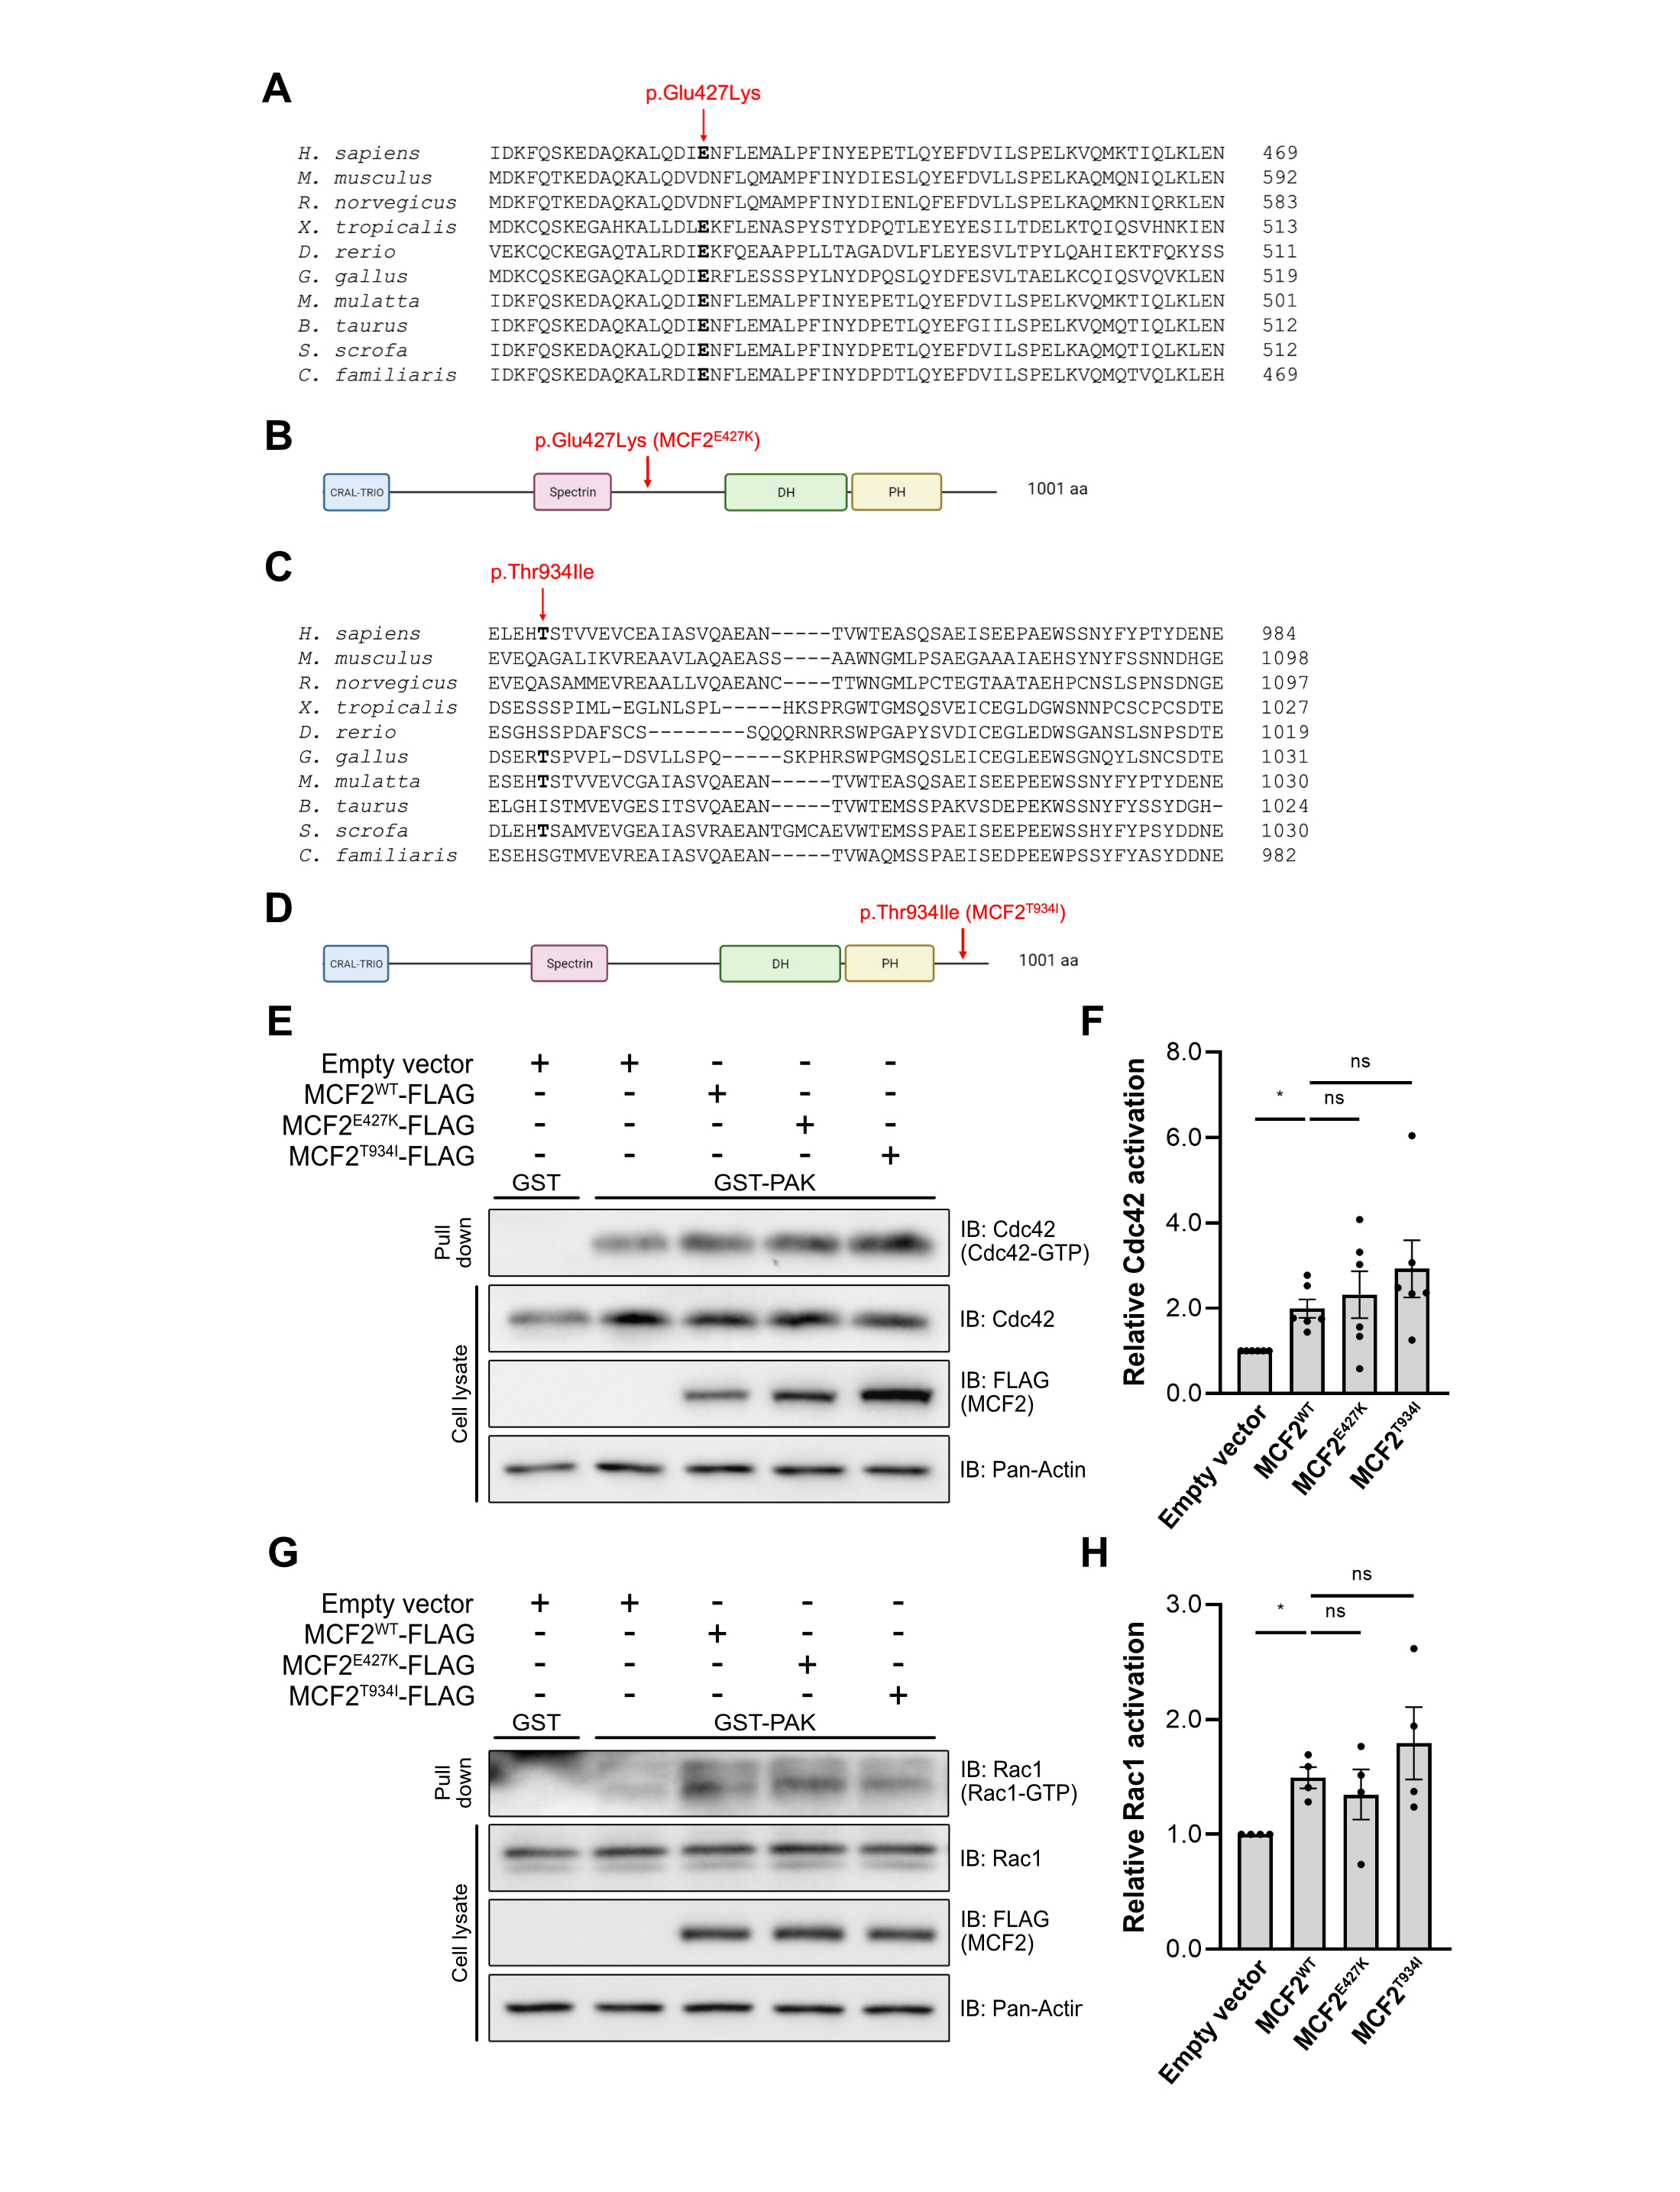


**(A, C)** Amino acid alignment of human MCF2 and its predicted orthologs shows that residue Glu427 is conserved across 8 out of 10 species and the residue Thr934 is conserved across 4 out of 10 species. **(B, D)** MCF2 schematic. The position of MCF2E427K and MCF2T934I are depicted. **(E, G)** COS7 cells were transfected with an empty vector, MCF2WT-FLAG, MCF2E427K-FLAG and MCF2T934I-FLAG, as indicated. Cells were lysed and assayed for active GTPases by pull-down of active Cdc42 **(E)** and Rac1 **(G)** using GST-PAK-coated beads. The amount of Cdc42 and Rac1 in pull-downs and in total cell lysates was detected by immunoblotting (IB) with the indicated antibodies. Relative activity of Cdc42 **(F)** and Rac1 **(H)** (mean ± SEM) was normalized to the total amount of each corresponding protein. MCF2E427K and MCF2T934I promote Cdc42 and Rac1 activation to similar levels as MCF2WT. n = 6 experiments for Cdc42 and n = 4 experiments for Rac1, RM one-way ANOVA, Tukey’s multiple comparison post-test, *p < 0.05, ns = not significant.

**Figure S2. MCF2WT and MCF2R11W affect actin-based structures in the cell**.


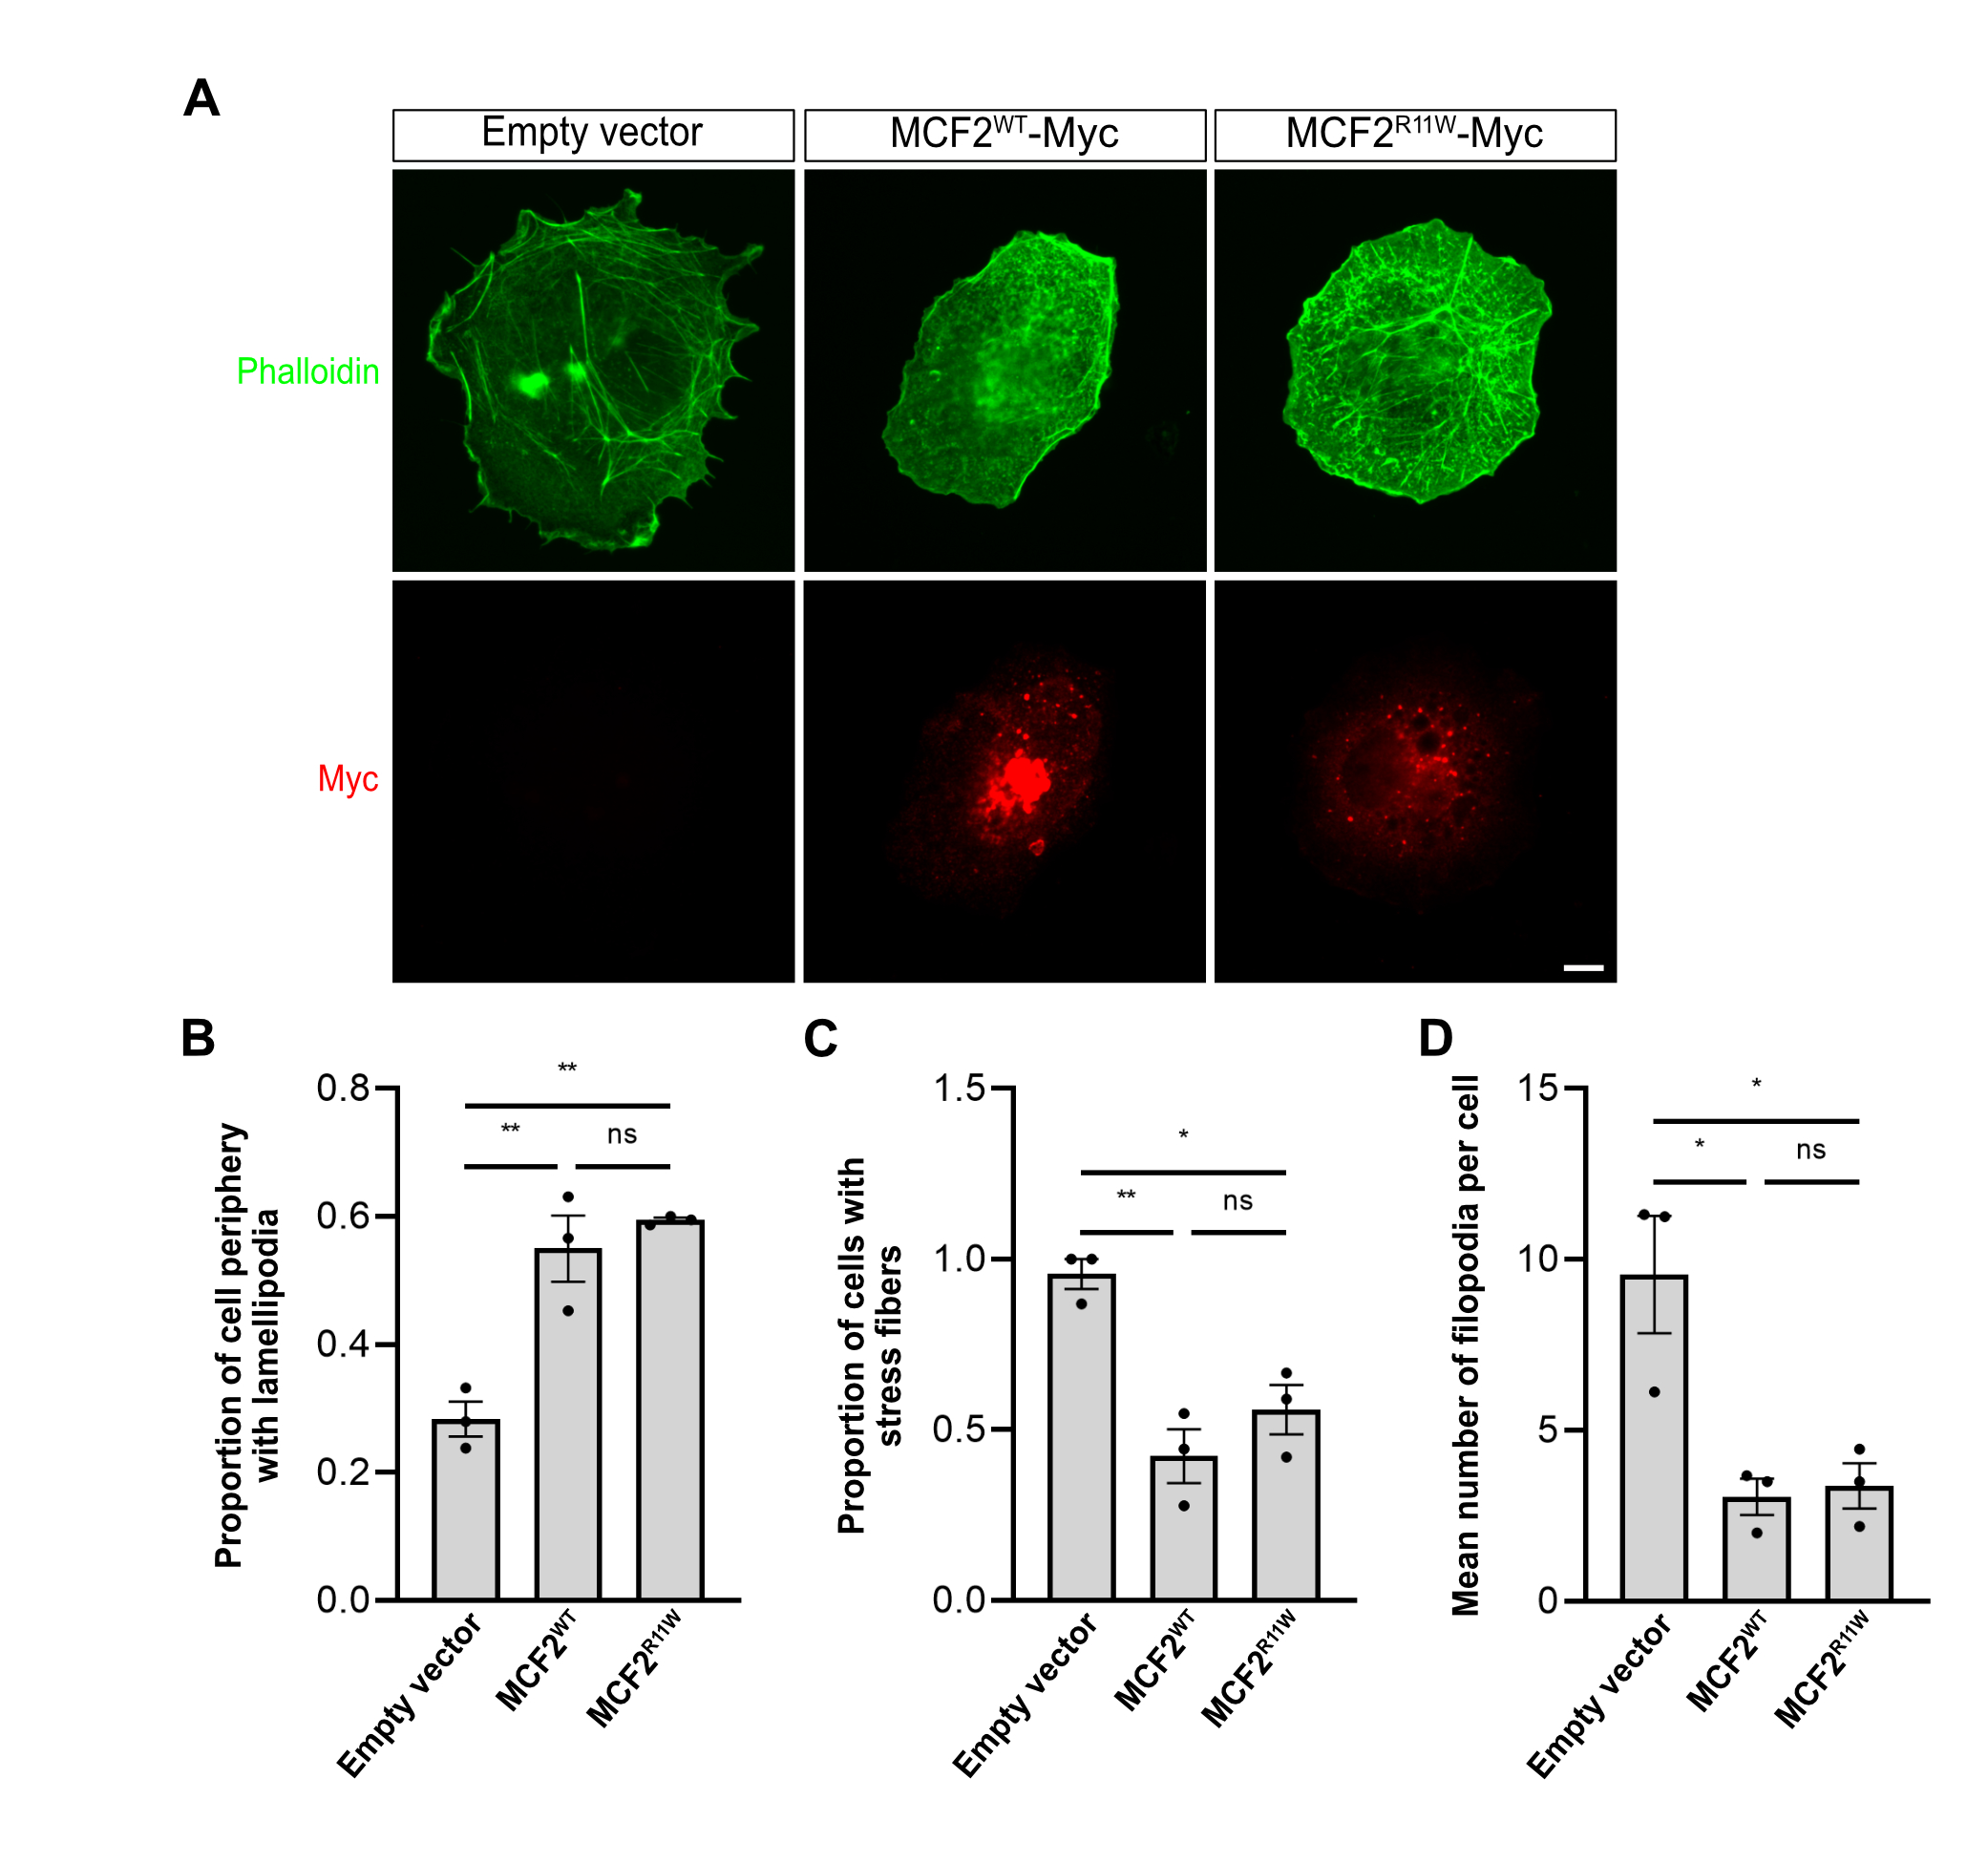


**(A)** COS7 cells were transfected with an empty vector, MCF2WT-Myc or MCF2R11W-Myc, as indicated. Cells were fixed and F-actin was detected with phalloidin and MCF2 was detected by immunostaining. Scale bar: 10 μm. **(B)** Proportion of cell periphery displaying lamellipodia (mean ± SEM). Cells transfected with MCF2WT and MCF2R11W have significantly more lamellipodia compared to control cells. **(C)** Proportion of cells displaying stress fibers (mean ± SEM). Cells transfected with MCF2WT and MCF2R11W have significantly less stress fibers compared to control cells. **(D)** Mean number of filopodia per cell (mean ± SEM). Cells transfected with MCF2WT and MCF2R11W have significantly less filopodia compared to control cells. **(B, C, D)** n = 3, One-way ANOVA, Tukey’s multiple comparison test, *p < 0.05 and **p < 0.01, ns = not significant.

**Figure S3. MCF2E427K and MCF2T934I interact with DCC and induce its relocalization from the cell periphery as efficiently as MCF2WT.**


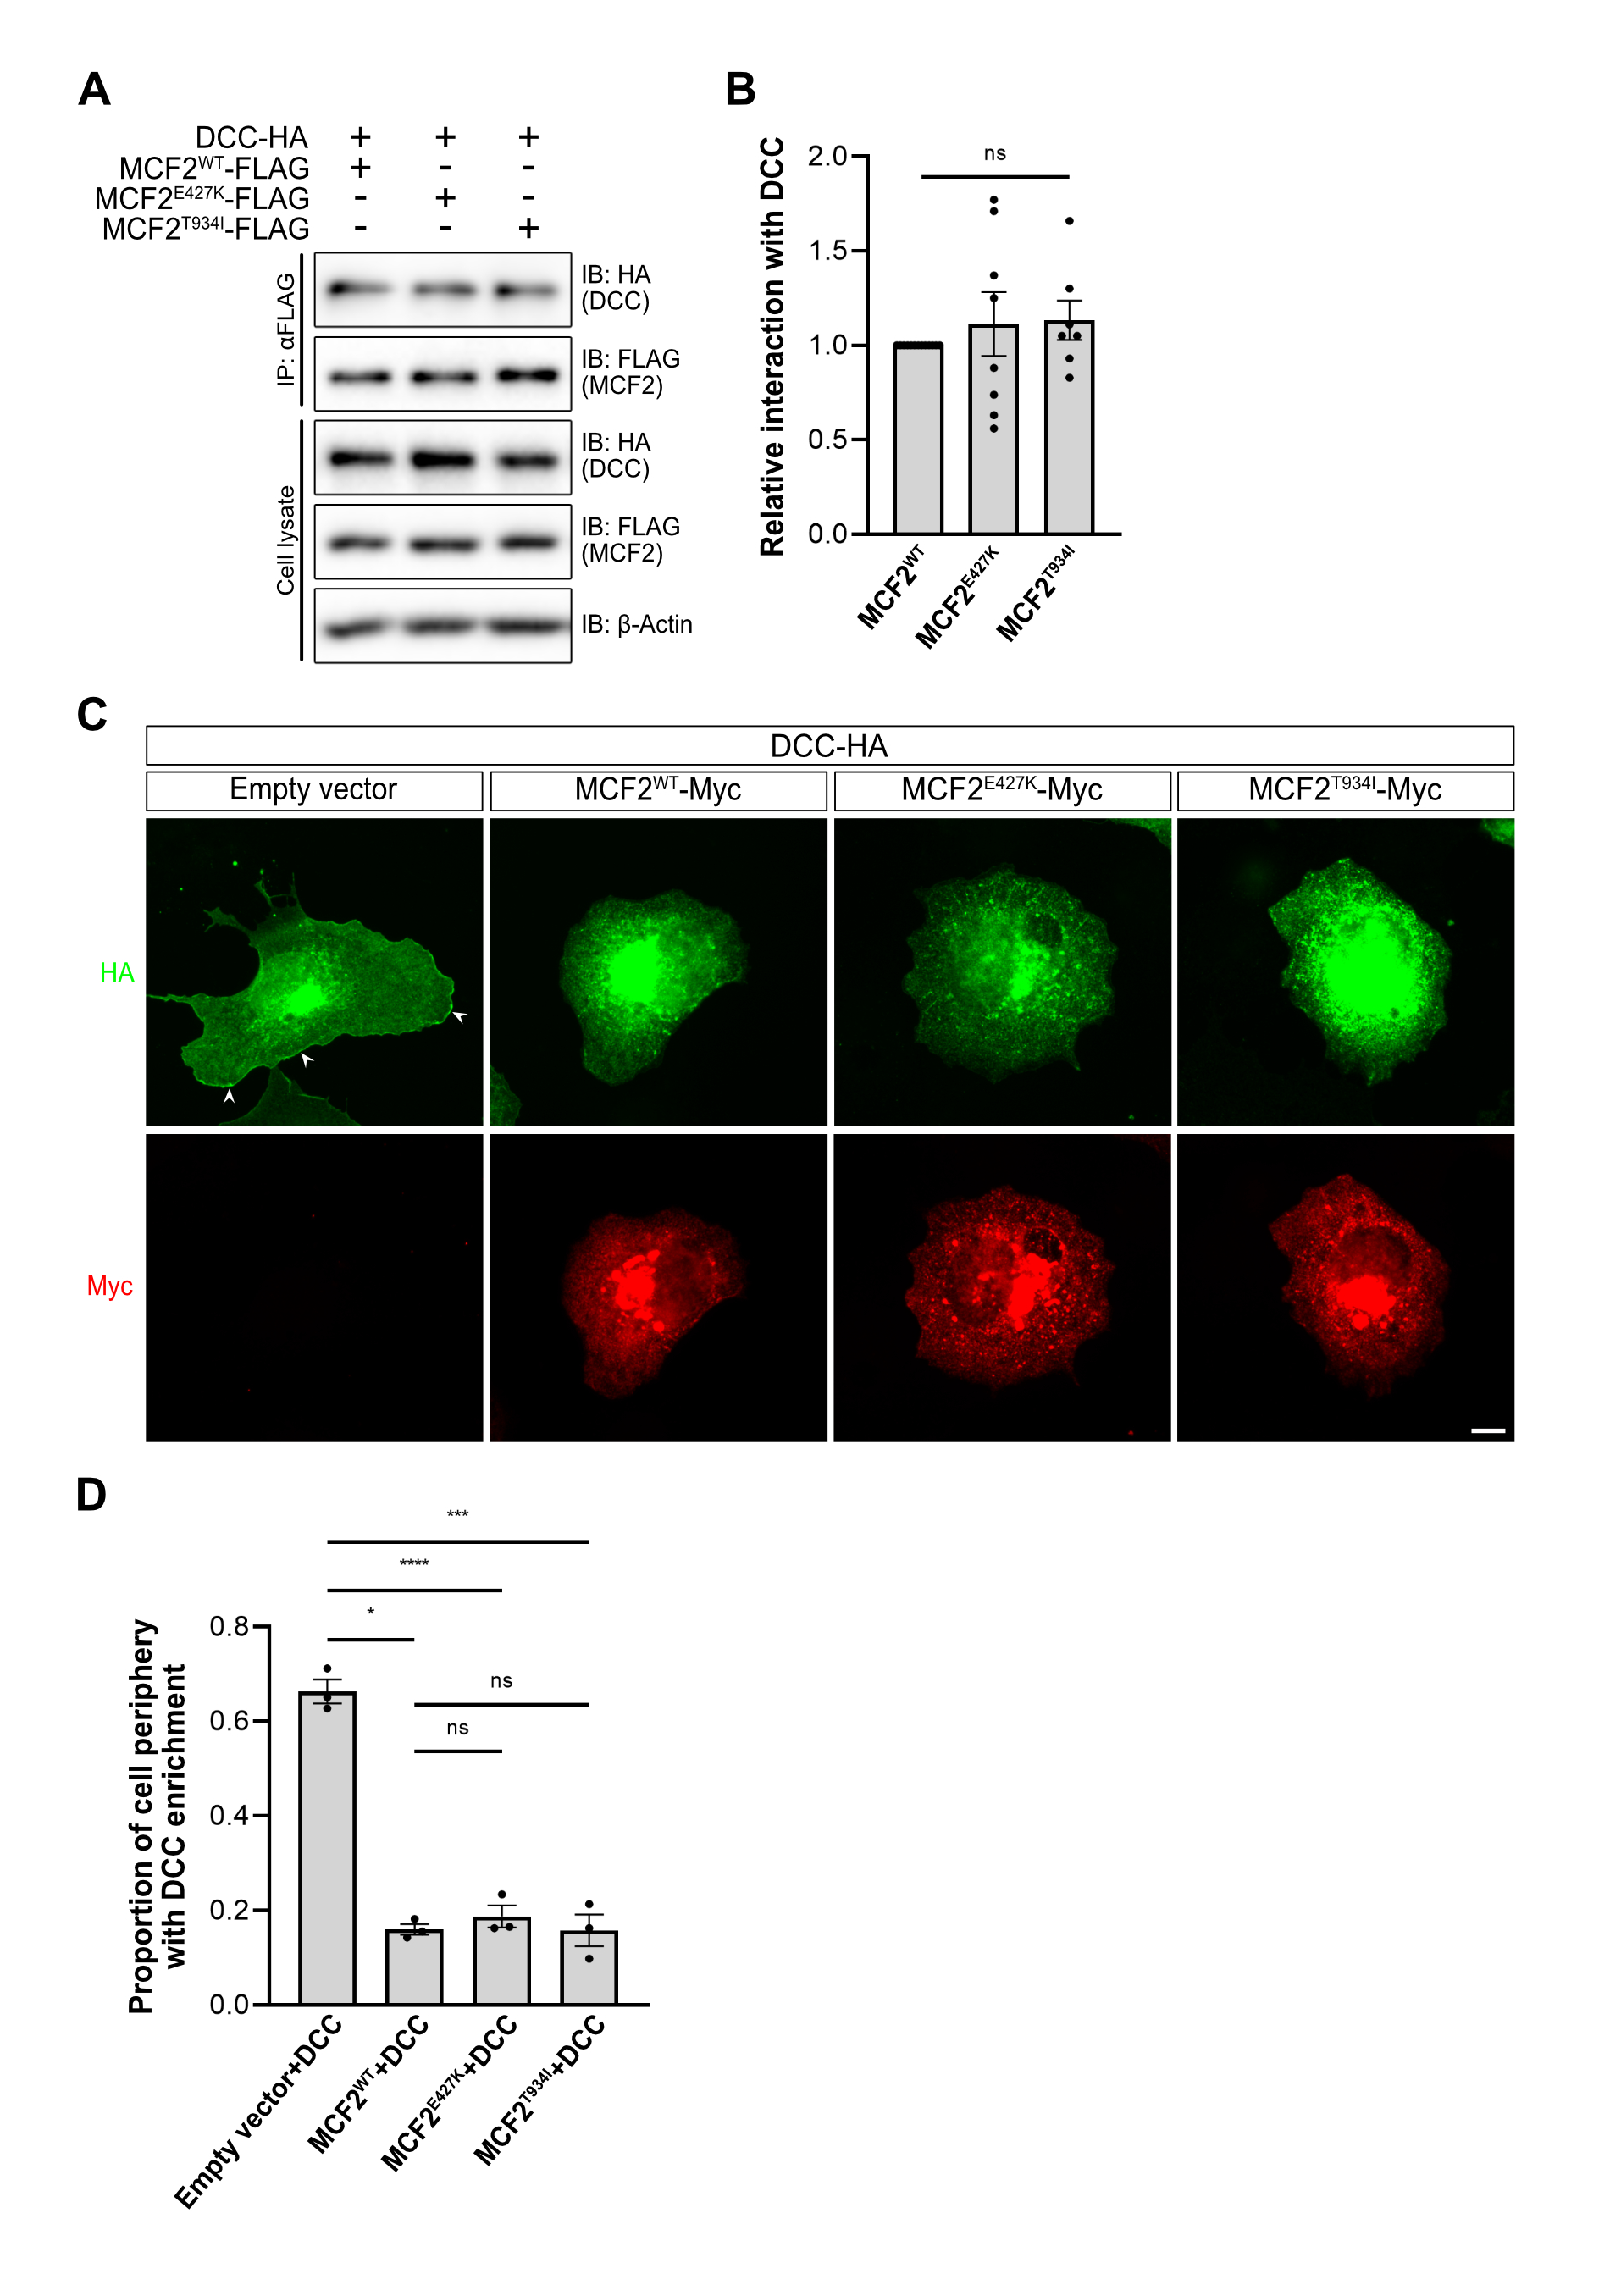


**(A)** COS7 cells were transfected with DCC-HA, MCF2WT-FLAG, MCF2E427K-FLAG and MCF2T934I-FLAG, as indicated. The cell lysates were immunoprecipitated (IP) with an anti-FLAG antibody and the immunoprecipitates were analyzed by immunoblotting (IB) with the indicated antibodies. DCC co-immunoprecipitates with MCF2WT-FLAG, MCF2E427K-FLAG and MCF2T934I-FLAG. **(B)** The relative amount of DCC interacting with MCF2WT, MCF2E427K and MCF2T934I (mean ± SEM), normalized to total DCC in the cell lysate. MCF2E427K and MCF2T934I have a similar level of interaction with DCC as MCF2WT. n = 8 for MCF2E427K and n = 7 for MCF2T934I, one-way ANOVA, Tukey’s multiple comparison post-test. ns = not significant. **(C)** COS7 cells were transfected with empty vector, DCC-HA, MCF2WT-Myc, MCF2E427K-Myc and MCF2T934I-Myc, as indicated. Cells were fixed and DCC and MCF2 were detected by immunostaining. White arrowheads indicate regions of the cell periphery with DCC enrichment. Scale bar: 10 μm. **(D)** Proportion of cell periphery with DCC enrichment (mean ± SEM). MCF2E427K and MCF2T934I significantly decrease DCC enrichment at the cell periphery to the same level as MCF2WT. n = 3, RM two-way ANOVA, Tukey’s multiple comparison test, *p < 0.05, ***p < 0.001 and ****p < 0.0001, ns = not significant.

**References:**

Woods, B. T., & Teuber, H. L. (1978). Mirror movements after childhood hemiparesis. *Neurology*, *28*(11), 1152–1157. https://doi.org/10.1212/wnl.28.11.1152
